# Supplementary material for: Characterization of the Drosophila Adult Hematopoietic System Reveals a Rare Cell Population With Differentiation and Proliferation Potential
Source: Front Cell Dev Biol. 2021 Oct 13;9:739357. doi: 10.3389/fcell.2021.739357 (PMC8550105; doi:10.3389/fcell.2021.739357)
Supplement: Supplementary Table 8 — Quantifications of domeMeso+ cells differentiating into NimC1+ hemocytes in control or in E. coli-infected adult flies (tubGAL80ts, domeMeso>G-TRACE). [file Table_8.XLSX]

## Sheet: Feuil1
	GFP+ NimC1-	GFP+ NimC1+	total	%
control	34	0	34	0
control	49	0	49	0
control	63	0	63	0
control	54	0	54	0
control	82	1	83	1.20482
control	37	0	37	0
control	50	0	50	0
infected	32	3	35	8.57143
infected	55	3	58	5.17241
infected	61	2	63	3.1746
infected	60	2	62	3.22581
infected	64	7	71	9.85915
infected	57	5	62	8.06452
infected	44	4	48	8.33333
infected	33	3	36	8.33333
infected	43	1	44	2.27273
